# Supplementary material for: Variations in cognitive abilities across the life course: Cross-sectional evidence from Understanding Society: The UK Household Longitudinal Study
Source: Intelligence. 2016 Nov-Dec;59:39–50. doi: 10.1016/j.intell.2016.07.001 (PMC5127898; doi:10.1016/j.intell.2016.07.001)
Supplement: Supplementary file 1 — Supplementary analyses. [file mmc1.docx]

Supplementary materials Figure S1: Prevalence of self-rated health in five categories by age among men and women

Supplementary materials Figure S2: Prevalence of self-rated memory in five categories by age among men and women

Supplementary materials Figure S3: Mean standardised z-scores for all five cognitive measures by age and self-rated health

Supplementary materials Figure S4: Mean standardised z-scores for all five cognitive measures by age and self-rated memory

Supplementary materials Figure S5: Mean standardised z-scores for all five cognitive measures by age and gender *in those with good or better self-rated health*

Supplementary materials Figure S6: Mean standardised z-scores for all five cognitive measures by age and gender *in those with good or better self-rated memory*

Supplementary materials Table S1: Parameter estimates and statistical significance tests for estimates of the main effects of age (λ1 andλ2 in Equation 1) and the age moderation (λ1′ and λ2′ in Equation 1) parameters for *g*-factor loadings and test uniquenesses in the moderated factor analysis model. All estimates are unstandardized.

| Test | Age parameter | Factor loading | | | Uniqueness | | |
| --- | --- | --- | --- | --- | --- | --- | --- |
| Estimate | SE | *p*-value | Estimate | SE | *p*-value |
| Word recall | Main effect | 0.362 | 0.009 | <0.001 | 0.765 | 0.006 | <0.001 |
| Moderation | 0.014 | 0.003 | <0.001 | 0.005 | 0.002 | 0.001 |
| Verbal fluency | Main effect | 0.368 | 0.010 | <0.001 | 0.886 | 0.006 | <0.001 |
| Moderation | 0.010 | 0.003 | <0.001 | -0.015 | 0.002 | <0.001 |
| Subtraction | Main effect | 0.449 | 0.010 | <0.001 | 0.770 | 0.006 | <0.001 |
| Moderation | 0.010 | 0.003 | <0.001 | 0.003 | 0.002 | 0.100 |
| Number sequence | Main effect | 0.553 | 0.009 | <0.001 | 0.575 | 0.007 | <0.001 |
| Moderation | 0.043 | 0.003 | <0.001 | 0.032 | 0.002 | <0.001 |
| Numerical problem solving | Main effect | 0.664 | 0.010 | <0.001 | 0.603 | 0.008 | <0.001 |
| Moderation | -0.001 | 0.003 | 0.674 | 0.003 | 0.003 | 0.225 |
